# Supplementary material for: Endogenic Phenolic Compounds of Barley as Potential Biomarkers Related to Grain Mycotoxin Production and Cultivar Selection
Source: MDPI journal article supplement (doi:10.3390/biology12101306), 2023-10-03
Supplement: s1 [file s1]

## Supplementary materials

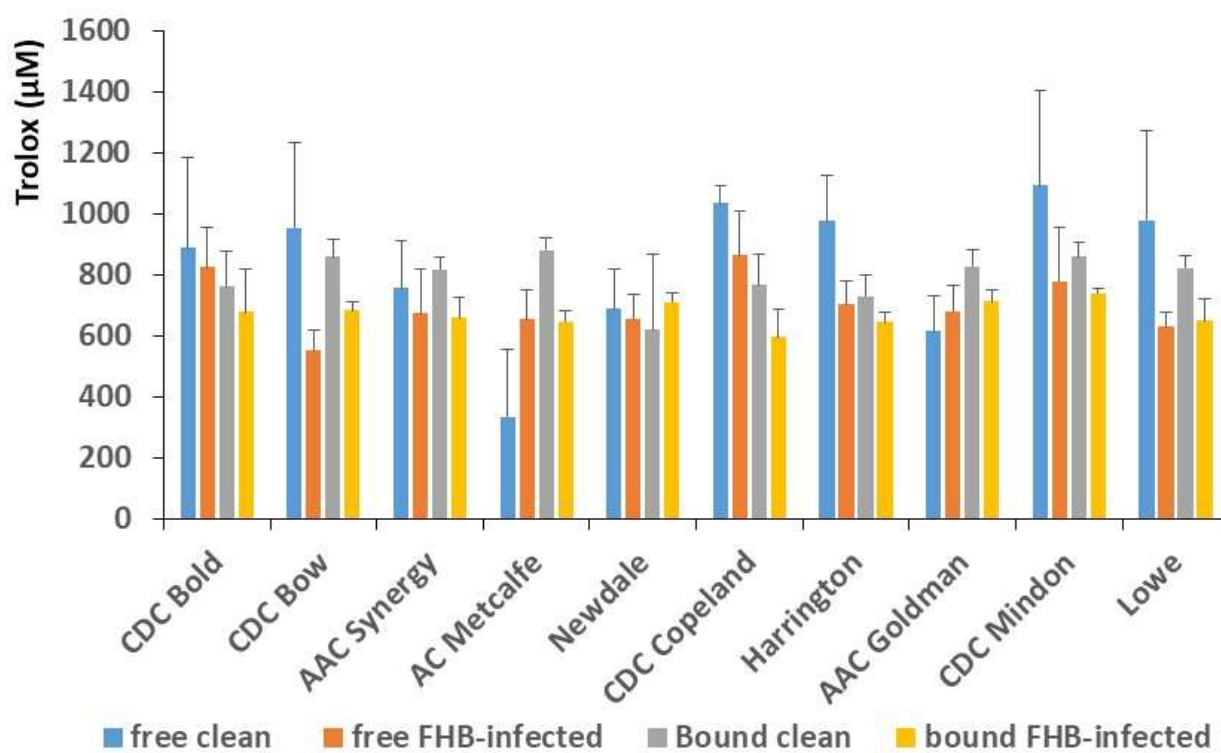

Figure S1. Antioxidant activity assay on free and bound fractions of clean and FHB-infected barley.

A.

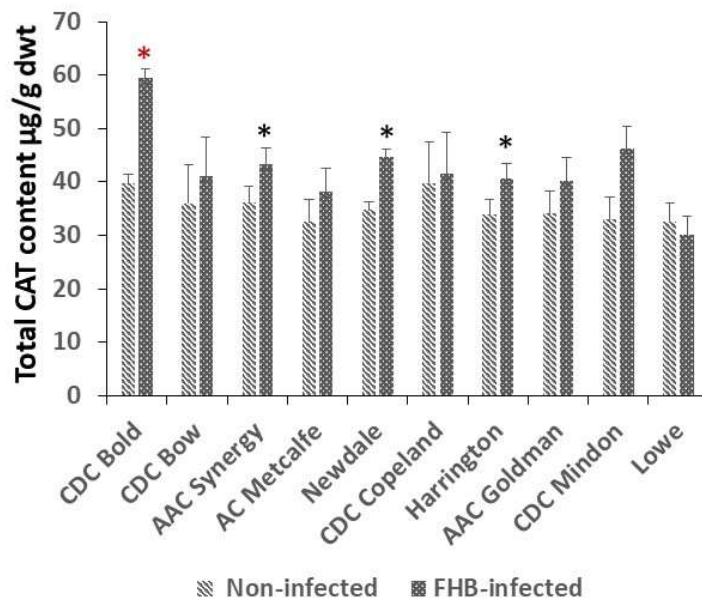

B

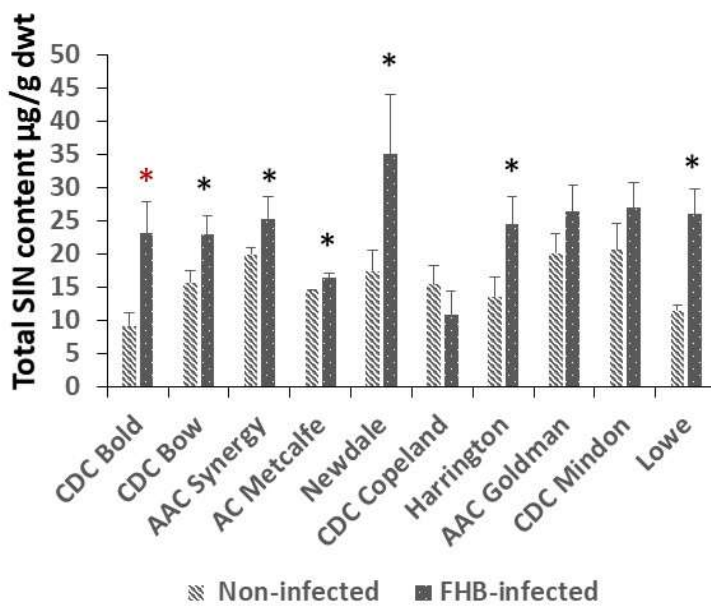

Figure S2. Changes in total (both free and bound) catechin (A) acid and sinapic acid (B) contents before and after FHB infection. \*Significant at level  $p \leq 0.05$  compared to the contents in non-infected (clean) grains of the tested cultivars. Susceptible check significant change is shown with \*.

A

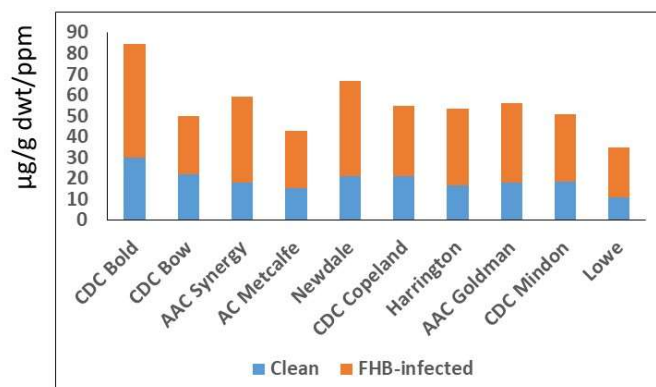

B

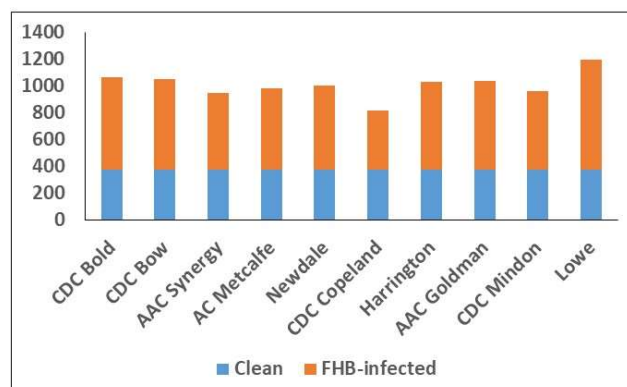

Figure S3. The sum of total individual phenolic compound contents of free (A) and bound (B) barley phenolic extracts. Blue shows clean extracts and orange shows FHB-infected barley grain extracts.

A)

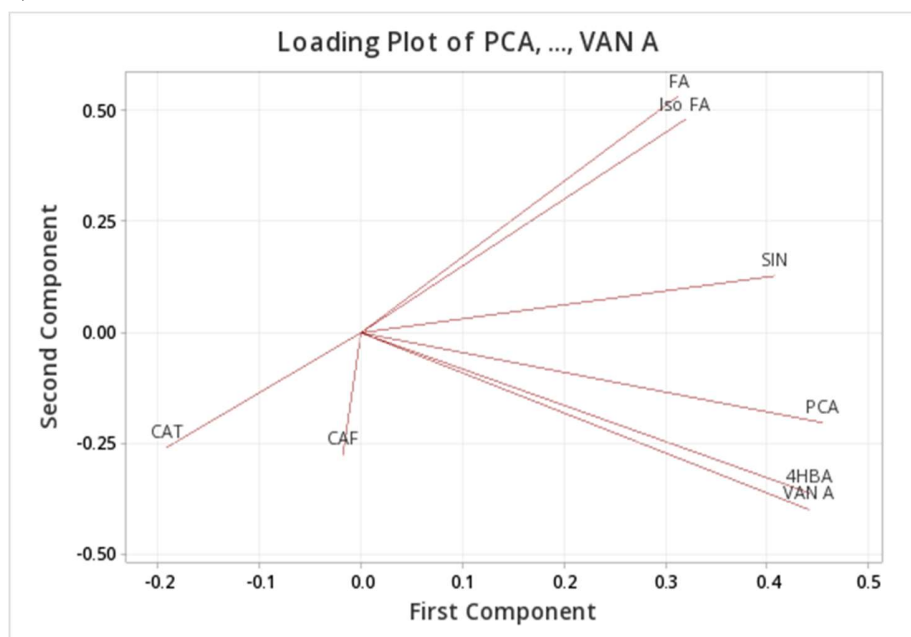

B)

| Variable | PC1    | PC2    | PC3    | PC4    | PC5    |
|----------|--------|--------|--------|--------|--------|
| PCA      | 0.455  | -0.202 | -0.184 | -0.065 | 0.625  |
| CAF      | -0.018 | -0.275 | 0.598  | 0.630  | 0.064  |
| SIN      | 0.407  | 0.128  | -0.467 | 0.290  | -0.439 |
| FA       | 0.313  | 0.532  | 0.033  | 0.031  | 0.400  |
| Iso FA   | 0.320  | 0.479  | 0.242  | 0.373  | -0.129 |
| CAT      | -0.192 | -0.259 | -0.533 | 0.592  | 0.243  |
| 4HBA     | 0.442  | -0.360 | 0.000  | -0.077 | -0.410 |
| VAN A    | 0.441  | -0.397 | 0.214  | -0.133 | 0.091  |

Figure S4. The principal component and cluster analysis of the selected phenolic compounds in tested 10 barley cultivars; (A) Loading plots of the principal component analysis; blue dots indicate each barley cultivar tested; (B) Eigenvectors for each principal component.

Table S1. The background information of cultivars used for the study

| Name                  | Class           | Year of Registration | FHB reaction | Origin/Breeding program* | Reference                              |
|-----------------------|-----------------|----------------------|--------------|--------------------------|----------------------------------------|
| <b>1. CDC Bold</b>    | General purpose | 1999                 | S (check)    | Canada/ U of S-CDC       | CFIA (Canadian Food Inspection Agency) |
| <b>2. CDC Bow</b>     | Malting         | 2016                 | MS           | Canada/ U of S-CDC       | CFIA                                   |
| <b>3.AAC Synergy</b>  | Malting         | 2012                 | I-MS         | Canada/ AAFC-BRDC        | Legge et al., 2014                     |
| <b>4.AC Metcalfe</b>  | Malting         | 1997                 | I            | Canada/ AAFC-BRDC        | Legge et al., 2003                     |
| <b>5. Newdale</b>     | Malting         | 2007                 | I            | Canada/ AAFC-BRDC        | Legge et al., 2008                     |
| <b>6.CDC Copeland</b> | Malting         | 1999                 | I            | Canada/ U of S-CDC       | CFIA                                   |
| <b>7. Harrington</b>  | Malting         | 1981                 | MR           | Canada/ U of S-CDC       | Harvey and Rossnagel, 1984             |
| <b>8.AAC Goldman</b>  | Malting         | 2018                 | MR           | Canada/ AAFC-BRDC        | Legge et al., 2018                     |
| <b>9.CDC Mindon</b>   | General purpose | 2007                 | MR (check)   | Canada/ U of S-CDC       | Rossnagel et al, 2008                  |
| <b>10. Lowe</b>       | Malting         | 2016                 | MR           | Canada/ AAF-FCDC         | Juskiw et al, 2019                     |

\* AAF-FCDC = Alberta Agriculture and Forestry - Field Crop Development Centre, Lacombe, AB; AAFC-BRDC = Agriculture and Agri-Food Canada - Brandon Research and Development Centre, Brandon, MB; and U of S - CDC = University of Saskatchewan - Crop Development Centre, Saskatoon, SK.

Table S2. Free phenolic compounds detected by high-performance liquid chromatography (HPLC) in non-infected (clean) barley cultivars.

| <b>Cultivar</b> | <b>Phenolic compound (µg/g dwt)</b> |            |           |            |
|-----------------|-------------------------------------|------------|-----------|------------|
|                 | <b>PCA</b>                          | <b>SIN</b> | <b>FA</b> | <b>CAT</b> |
| CDC Bold        | 0.109±0.04                          | 0.36±0.1   | 2.50±0.2  | 26.9±0.9** |
| CDC Bow         | ND                                  | 0.11±0.04  | 1.79±0.2  | 20.1±5.1   |
| AAC Synergy     | ND                                  | 0.23±0.01  | 2.19±0.1  | 15.8±1.1   |
| AC Metcalfe     | ND                                  | 0.17±0.08  | 1.79±0.1  | 13.3±1.0   |
| Newdale         | 0.067±0.03                          | 0.15±0.01  | 2.09±0.1  | 18.7±0.8   |
| CDC Copeland    | 0.056±0.02                          | 0.34±0.2   | 2.48±0.2  | 18.3±0.6   |
| Harrington      | ND                                  | 0.35±0.04  | 2.78±0.1  | 13.8±1.0   |
| AAC Goldman     | ND                                  | 0.19±0.1   | 2.00±0.1  | 16.1±1.4   |
| CDC Mindon      | ND                                  | 0.42±0.2   | 2.61±0.1  | 15.5±1.0   |
| Lowe            | 0.283±0.03                          | 0.25± 0.1  | 2.44±0.1  | 8.1±0.5*   |

ND- Not detected

PCA- P coumeric acid, SIN- sinapic acid, FA- ferulic acid, CAT- catechin

\*\*- Highest content of the specific phenolic compound

\*-Lowest content of the specific phenolic compound

Table S3. Free phenolic compounds detected by HPLC in FHB-infected barley cultivars.

| Cultivar     | Phenolic compound (µg/g dwt) |         |          |            |
|--------------|------------------------------|---------|----------|------------|
|              | SIN                          | FA      | Iso FA   | CAT        |
| CDC Bold     | 10.8±3.6**                   | 2.2±0.1 | 0.36±0.1 | 41.2±5.7** |
| CDC Bow      | 1.52±0.8*                    | 1.6±0.1 | ND       | 24.9±4.2   |
| AAC Synergy  | 7.58±2.8                     | 2.2±0.3 | 1.96±0.5 | 29.5±3.5   |
| AC Metcalfe  | 2.27±0.1*                    | 1.8±0.3 | 0.21±0.1 | 23.2±0.7   |
| Newdale      | 12.8±6.3**                   | 2.3±0.2 | 1.11±0.4 | 29.6±2.1   |
| CDC Copeland | 4.76±2.0                     | 1.9±0.4 | 0.63±0.2 | 26.3±3.7   |
| Harrington   | 7.71±2.1                     | 2.3±0.6 | 0.38±0.2 | 26.4±4.2   |
| AAC Goldman  | 7.15±2.8                     | 2.1±0.2 | 1.63±0.2 | 26.9±4.7   |
| CDC Mindon   | 7.69±1.1                     | 1.9±0.4 | 0.92±0.2 | 21.7±5.2   |
| Lowe         | 7.66±1.6                     | 2.4±0.2 | 0.62±0.2 | 13.2±2.8*  |

ND- Not detected

SIN- sinapic acid, FA- ferulic acid, Iso-FA- Iso ferulic acid, CAT- catechin

\*\* - Highest content of the specific phenolic compound

\* - Lowest content of the specific phenolic compound

Table S4. Bound phenolic compound contents in different cultivars of non-infected (clean) barley.

| Cultivar     | Phenolic compound (µg/g dwt) |            |            |           |            |            |             |             |
|--------------|------------------------------|------------|------------|-----------|------------|------------|-------------|-------------|
|              | PCA                          | CAF        | SIN        | FA        | Iso FA     | CAT        | 4HBA        | VAN A       |
| CDC Bold     | 140±17*                      | 8.6±2.6 *  | 8.9±1.9*   | 191±46.5* | 12.2±4.1*  | 12.8±0.8*  | 1.81±0.27   | 4.85±0.25*  |
| CDC Bow      | 228±53                       | 9.9±0.7    | 15.7±1.7   | 293±41.5  | 14.2±1.8   | 15.9±2.1   | 1.88±0.07   | 6.74±1.23   |
| AAC Synergy  | 214±22                       | 12.8±1.0   | 19.8±0.9   | 382±14.3  | 22.5±1.0   | 20.3±2.0   | 2.90±0.32   | 9.21±1.21   |
| AC Metcalfe  | 202±23                       | 11.1±0.8   | 14.4±0.1   | 338±15.4  | 20.9±1.3   | 19.2±3.3   | 2.81±0.09   | 9.88±1.71** |
| Newdale      | 262±45                       | 11.7±1.4   | 17.4±3.0   | 359±47.7  | 18.9±3.5   | 16.1±3.7   | 2.81±1.01   | 9.25±0.34   |
| CDC Copeland | 236±34                       | 10.6±2.1   | 15.2±2.5   | 342±4.2   | 16.9±2.9   | 21.5±7.1   | 1.64±0.24*  | 8.19±1.49   |
| Harrington   | 209±27                       | 13.5±2.1   | 13.3±2.9   | 469±101** | 24.2±7.0** | 20.2±1.8   | 1.88±0.13   | 8.41±0.08   |
| AAC Goldman  | 245±54                       | 14.5±0.8   | 20.0±2.9** | 377±33.2  | 21.8±1.4   | 18.0±2.9   | 3.18±0.12** | 9.33±1.41   |
| CDC Mindon   | 265±35                       | 15.8±3.3** | 20.3±3.7** | 375±51.5  | 22.5±5.5   | 17.5±3.0   | 2.33±0.1    | 9.37±1.65** |
| Lowe         | 331±96**                     | 10.4±1.1   | 11.3±0.8   | 368±25.5  | 17.4±1.5   | 24.6±2.9** | 2.21±0.25   | 9.41±1.45   |



Table S5. Bound phenolic compound contents in different cultivars of FHB-infected barley.

| Cultivar     | Phenolic compound (µg/g dwt) |            |            |            |            |            |             |             |
|--------------|------------------------------|------------|------------|------------|------------|------------|-------------|-------------|
|              | PCA                          | CAF        | SIN        | FA         | Iso FA     | CAT        | 4HBA        | VAN A       |
| CDC Bold     | 305±38                       | 11.0±1.3   | 12.5±1.1*  | 317±54.3   | 14.6±2.7   | 18.3±3.3   | 2.63±0.36   | 9.12±1.70   |
| CDC Bow      | 308±80                       | 8.7±1.4    | 21.4±2.1   | 293±59.5   | 13.9±1.4*  | 16.2±1.6   | 2.34±0.42   | 8.82±0.42   |
| AAC Synergy  | 206±22                       | 10.6±1.6   | 17.8±0.6   | 293±72.0   | 16.6±2.7   | 13.8±1.3   | 2.35±0.36   | 8.93±0.91   |
| AC Metcalfe  | 238±9                        | 11.3±0.5   | 14.2±0.6   | 300±51.7   | 15.2±0.7   | 15.0±1.7   | 2.35±0.13   | 9.69±1.29   |
| Newdale      | 261±42                       | 9.2±0.5    | 22.4±2.6** | 288±48.8   | 14.2±3.2   | 15.1±1.9   | 3.68±0.77** | 9.65±0.20   |
| CDC Copeland | 152±31*                      | 10.5±1.2   | 10.2±1.5   | 228±28.0*  | 11.4±1.7*  | 15.3±0.4   | 2.51±0.71   | 8.21±2.51   |
| Harrington   | 177±43                       | 8.4±2.2*   | 16.8±2.2   | 412±84.6   | 19.0±8.9** | 14.3±2.3   | 1.61±0.13*  | 7.20±1.62*  |
| AAC Goldman  | 263±21                       | 10.3±1.2   | 19.3±1.3   | 322±16.4   | 18.0±3.3   | 13.4±0.9*  | 3.07±0.32   | 9.51±0.98   |
| CDC Mindon   | 208±50                       | 12.2±1.9** | 19.4±2.6   | 304±53.5   | 18.3±4.2   | 14.6±1.0   | 2.41±0.36   | 8.12±1.98   |
| Lowe         | 325±67**                     | 10.6±1.0   | 18.4±2.2   | 417±73.5** | 19.9±4.7** | 16.9±0.6** | 3.43±1.18   | 10.1±0.91** |
